# Supplementary material
Source: Research Square preprint supplement (doi:10.21203/rs.3.rs-9086762/v1)
Supplement: Supplementary file 1 [file f7cb5d9d56aefa5d27bb160f.docx]

**Supplementary Figure S1:** Root-to-tip regression analysis showing temporal signal in Rift Valley fever virus M segment genomes.

**Supplementary Figure S2:** **Phylogenetic structure of RVFV L segment by host and geographic region.** The tips are colored by host category (human, livestock, wildlife and vector). The heatmaps show the geographic regions (North: Egypt, East: Uganda, Kenya, Madagascar, South: South Africa, Namibia, Zimbabwe, Central: Central African Republic, Angola and West Africa: Mauritania, Senegal, Burkina Faso, Guinea). Bootstrap values are shown on major nodes to indicate statistical support.

**Supplementary Figure S3:** **Phylogenetic structure of RVFV S segment by host and geographic region.** The tips are colored by host category (human, livestock, wildlife and vector). The heatmaps show the geographic regions (North: Egypt, East: Uganda, Kenya, Madagascar, South: South Africa, Namibia, Zimbabwe, Central: Central African Republic, Angola and West Africa: Mauritania, Senegal, Burkina Faso, Guinea). Bootstrap values are shown on major nodes to indicate statistical support.
